# Supplementary material
Source: Springer Nature journal article supplement (https://www.springermedizin.de/resource/supplementary/40164_2013_61_MOESM1_ESM.pdf/9687098)

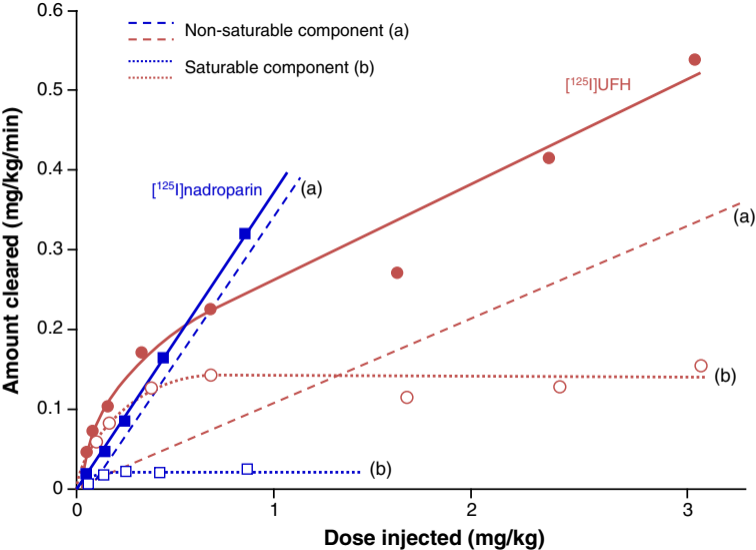

Supplement: MOESM1 [file 9687098]
